# Supplementary material
Source: HighWire-hosted journal article supplement (https://www.annfammed.org/highwire/filestream/12994/field_highwire_adjunct_files/0/knight-inno_supp_app_.pdf)
Supplement: knight-inno_supp_app_.pdf [file knight-inno_supp_app_.pdf]

## Supplemental materials for:

Knight A, Harris M, Li F, Green J, Knight A. Connecting GPs through a facilitated community of practice for chronic disease care. *Ann Fam Med*. 2020;18(1):xxx-xxx.

Hyun Jung Song, BAsC, MSc <sup>1,2</sup>

Mark Harris, MBBS, MD <sup>1</sup>

Fan-Yin Li, BSc <sup>3</sup>

Jennifer Green, BSc, MSc <sup>3</sup>

Andrew Knight, MBBS, MMedSci <sup>2</sup>

<sup>1</sup> Centre for Primary Health Care and Equity, UNSW Australia

<sup>2</sup> The Academic Primary and Integrated Care Unit (APICU), South Western Sydney Local Health District, Sydney, Australia

<sup>3</sup> South Western Sydney Primary Health Network, Sydney, Australia

Conflicts of interest: authors report none.

**Key words:** community of practice; general practitioners; chronic disease care

**Ethics:** This study was approved by the South Western Sydney Local Health District (SWSLHD) Human Research Ethics Committee (HREC Reference LNR/18/LPOOL/198).

**Funding support:** Funding for this study was provided by the South Western Sydney Primary Health Network and administered by the Centre of Primary Health Care and Equity of University of New South Wales.

**Acknowledgments:** We acknowledge the contribution of the staff of The Academic Primary and Integrated Care Unit (APICU) of South Western Sydney Local Health District for their assistance with participant recruitment and logistics support for the meetings.

## References

1. Wenger E, McDermott R, Snyder WM. Cultivating communities of practice: a guide to managing knowledge - seven principles for cultivating communities of practice. working knowledge, business research for business leaders. Web site. <https://hbswk.hbs.edu/archive/cultivating-communities-of-practice-a-guide-to-managing-knowledge->

seven-principles-for-cultivating-communities-of-practice. Published 2002. Accessed Jun 20, 2019.

2. Kjeldmand D, Holmström I. Difficulties in Balint groups: a qualitative study of leaders' experiences. *Br J Gen Pract.* 2010;60(580):808-814.

3. Watt G; Deep End Steering Group. GPs at the deep end. *Br J Gen Pract.* 2011; 61(582):66-67.

4. Rohrbasser A, Harris J, Mikan S, Tal K, Wong G. Quality circles for quality improvement in primary health care: Their origins, spread, effectiveness and lacunae- A scoping review. *PLoS One.* 2018;13(12):e0202616.

5. Li LC, Grimshaw JM, Nielsen C, Judd M, Coyte PC, Graham ID. Use of communities of practice in business and health care sectors: a systematic review. *Implement Sci.* 2009;4:27.

6. Fairfield Health Alliance. Strategic Priorities for Fairfield Health Alliance: Summary Report of Phase 2 Workshops held in November 2017. North Sydney. 2017.
